# Supplementary material for: Longitudinal Profiling of the Macaque Vaginal Microbiome Reveals Similarities to Diverse Human Vaginal Communities
Source: PubMed Central journal article supplement (PMC8092128; doi:10.1128/msystems.01322-20), 2021-04-27

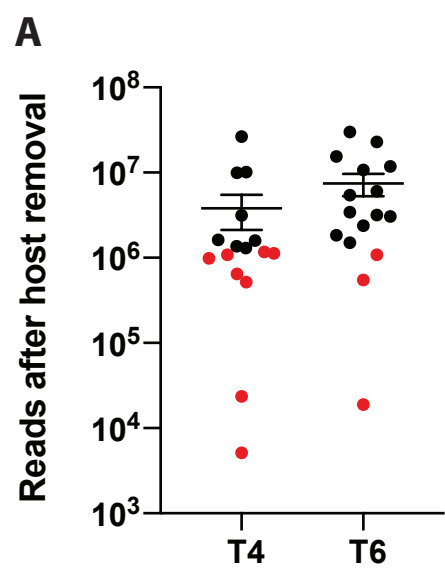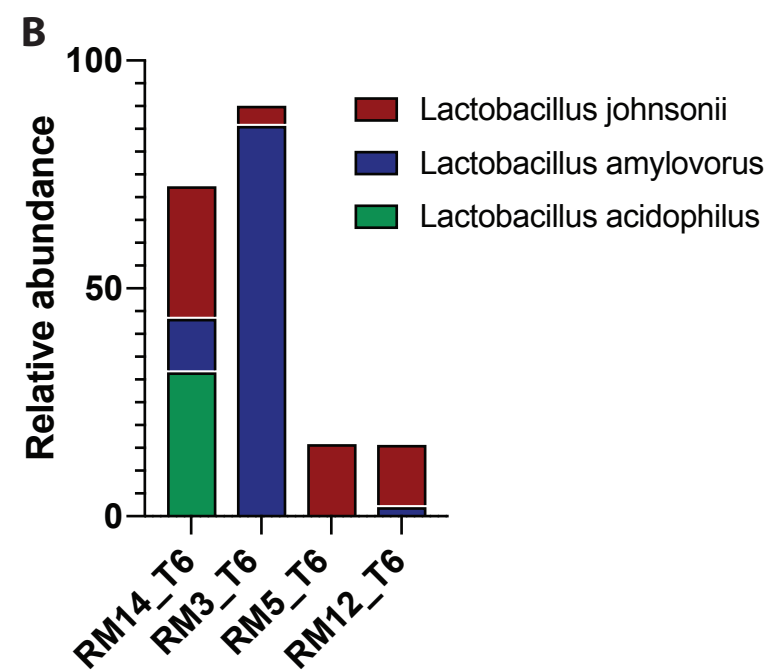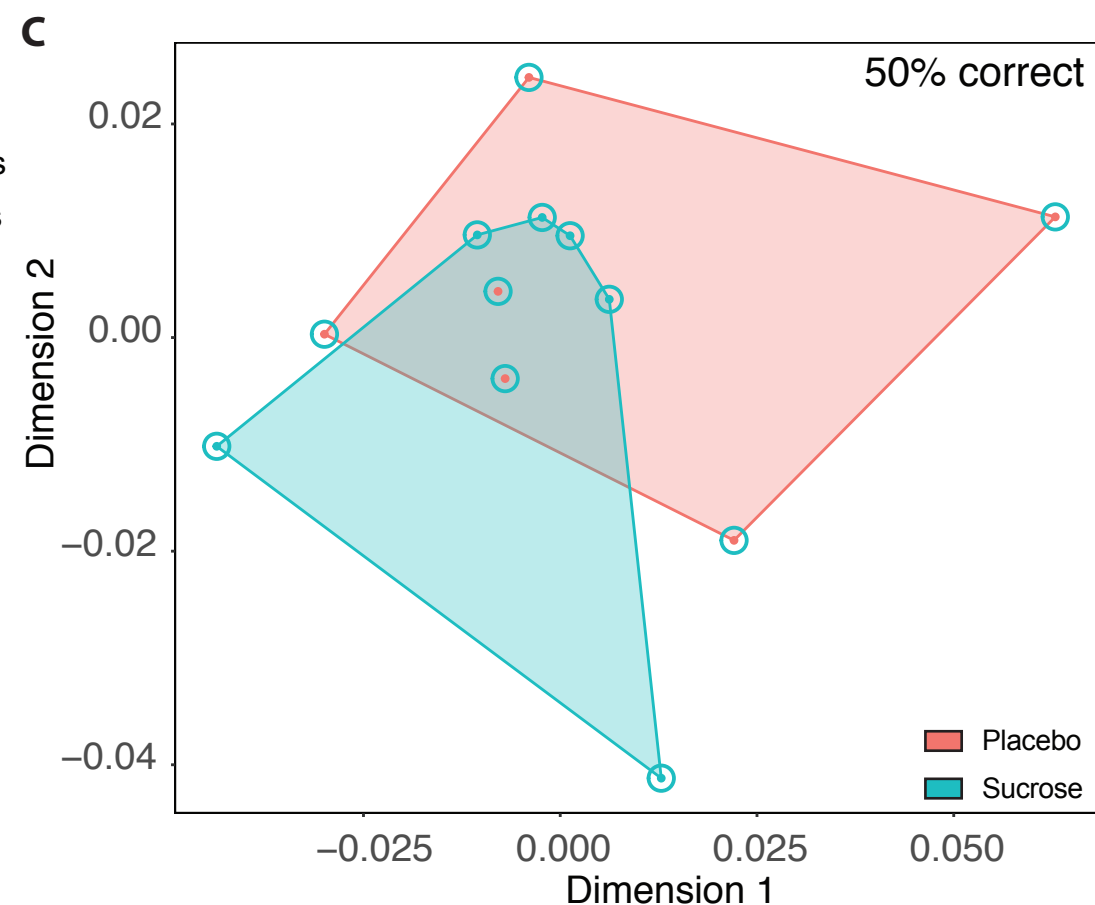

**D**

| Genus           | Total | T4 | T6 |
|-----------------|-------|----|----|
| Atopobacter     | 2     | 0  | 2  |
| Atopobium       | 2     | 1  | 1  |
| Campylobacter   | 2     | 0  | 2  |
| Fastidiphila    | 7     | 0  | 7  |
| Gardnerella     | 9     | 2  | 7  |
| Mobiluncus      | 6     | 2  | 4  |
| Parabacteroides | 5     | 2  | 3  |
| Peptoniphilus   | 3     | 1  | 2  |
| Porphyromonas   | 7     | 2  | 5  |
| Prevotella      | 8     | 2  | 6  |
| Sneathia        | 3     | 1  | 2  |
| Tissierellia    | 3     | 0  | 3  |
| Veillonellaceae | 3     | 1  | 2  |

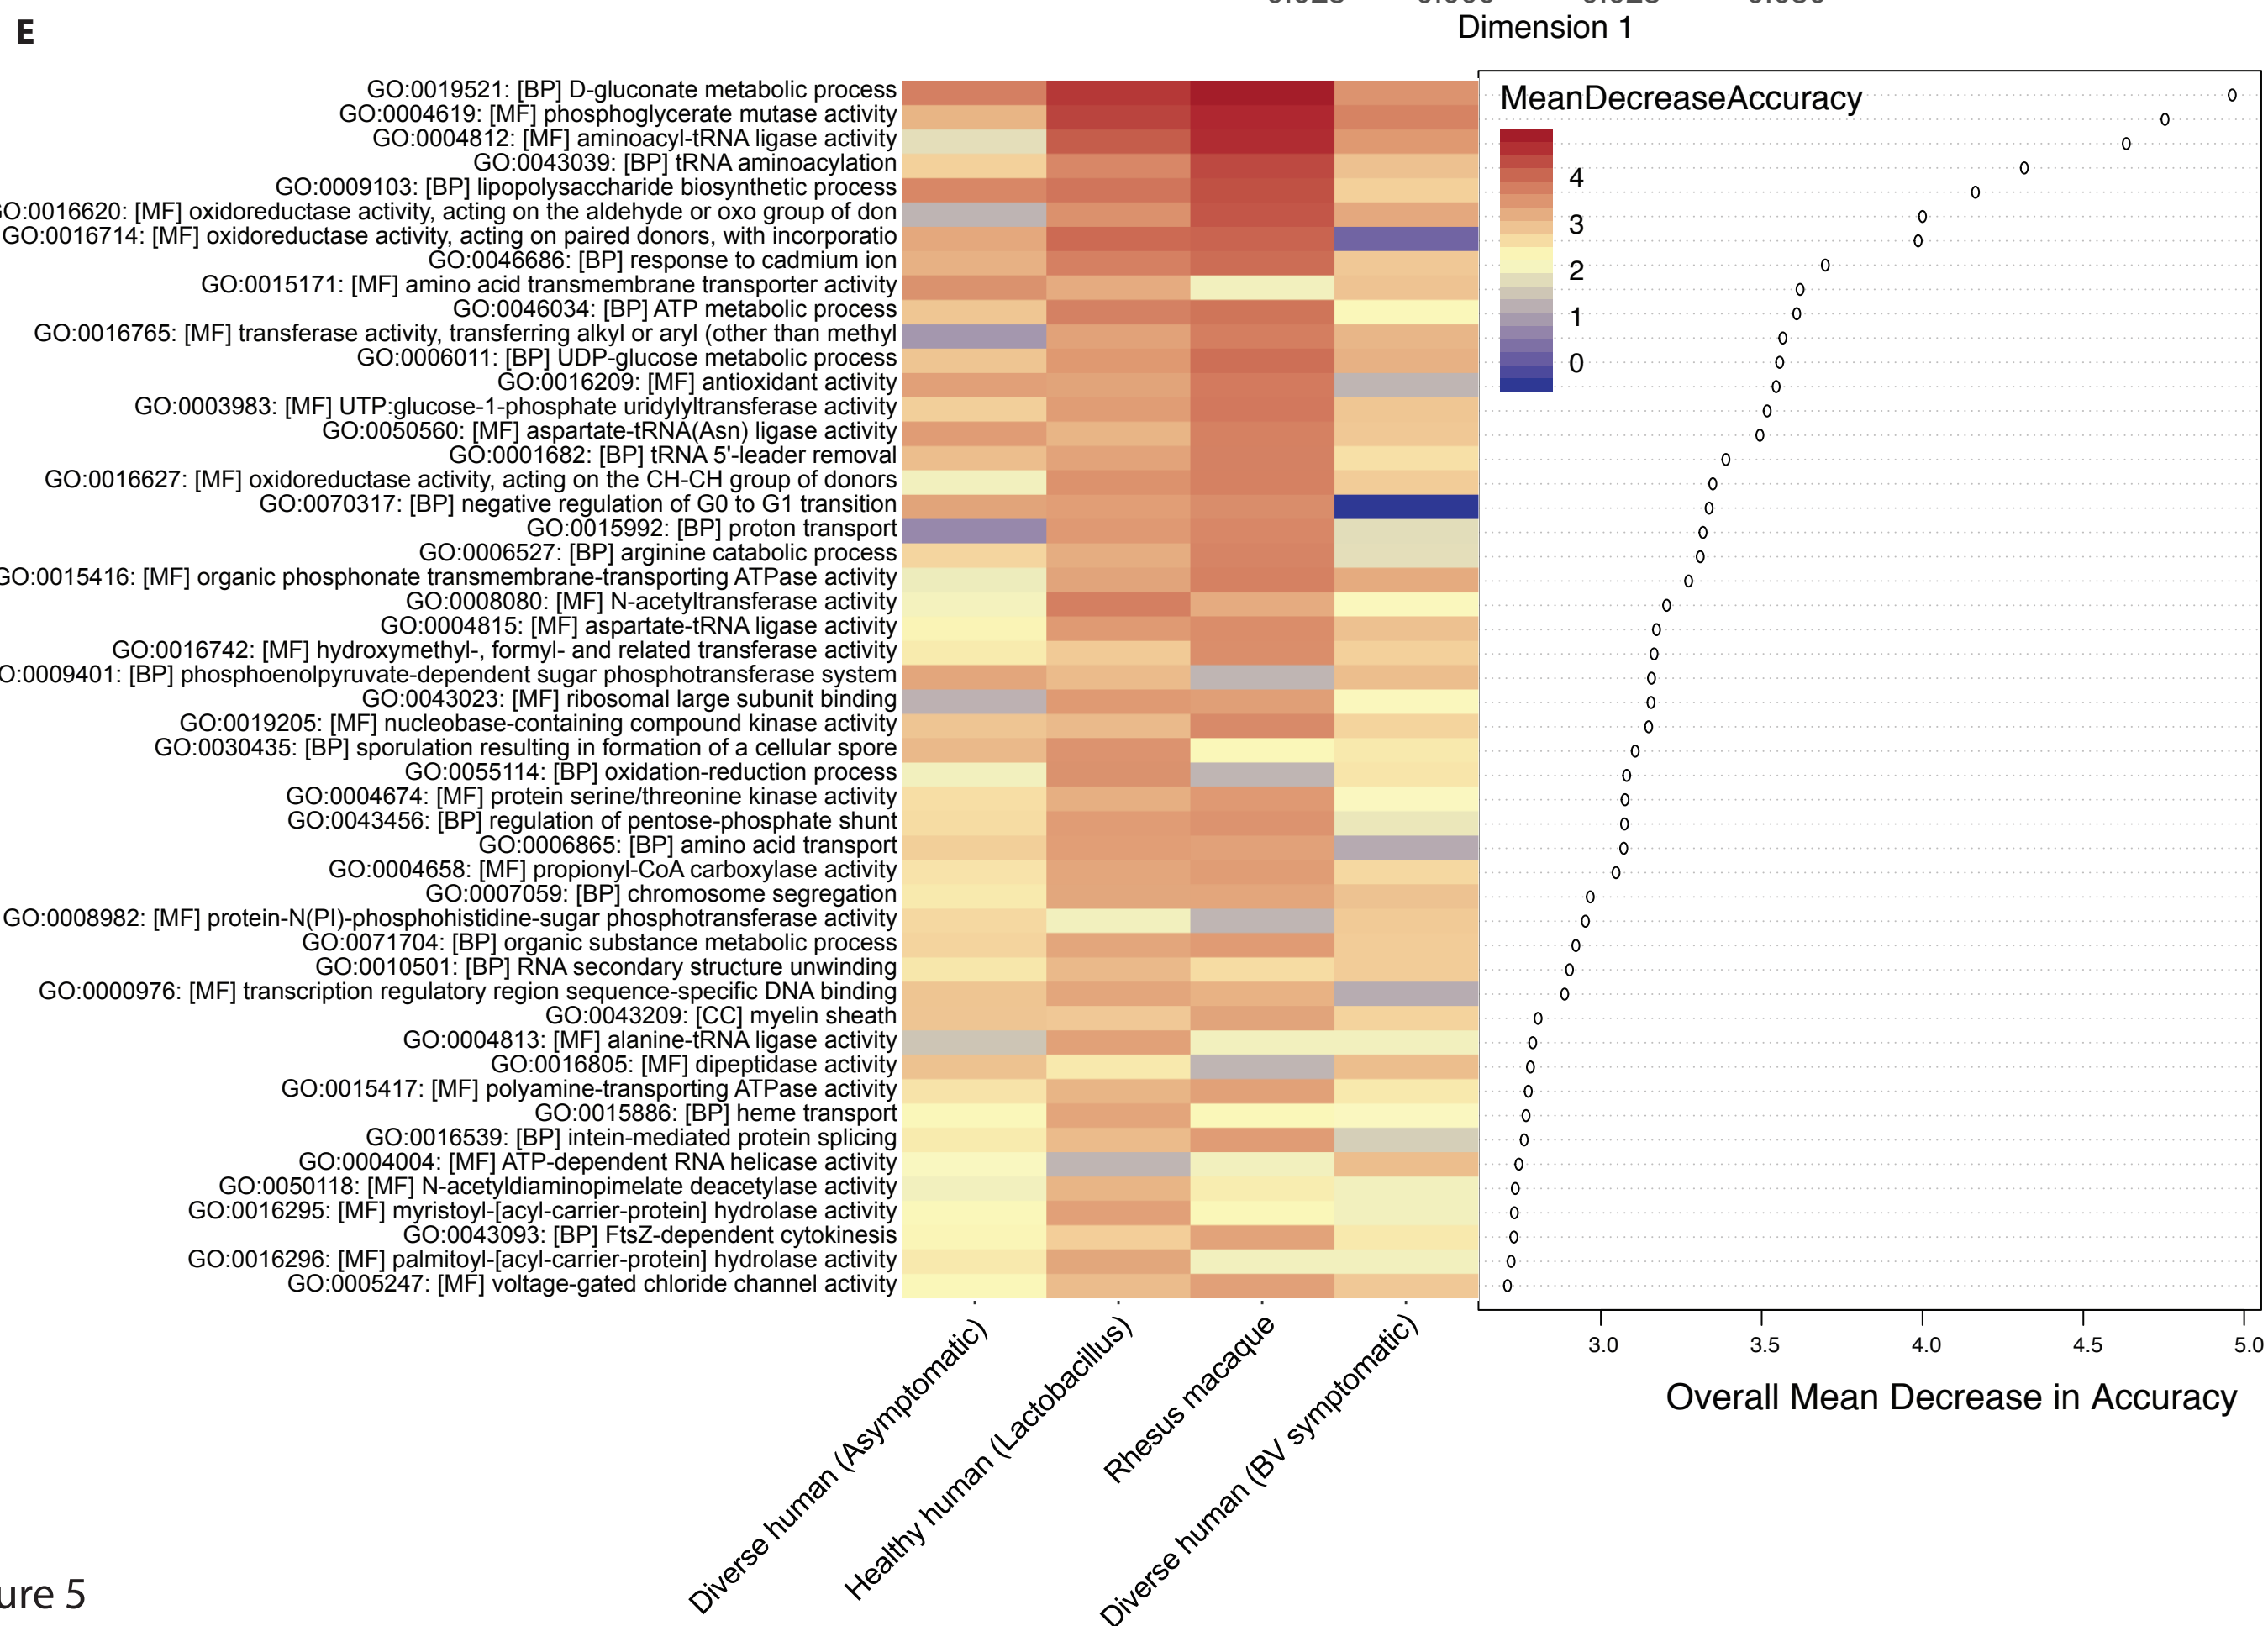

Supplement: mSystems.01322-20-sf005.pdf [file mSystems.01322-20-sf005.pdf]
