# Supplementary material for: Longitudinal Profiling of the Macaque Vaginal Microbiome Reveals Similarities to Diverse Human Vaginal Communities
Source: PubMed Central journal article supplement (PMC8092128; doi:10.1128/msystems.01322-20), 2021-04-27
Supplement: mSystems.01322-20-st001.pdf [file mSystems.01322-20-st001.pdf]

| Animal | Treatment group | Visit | Nugent Score | Clue Cells Present? | Gram Stain Comments           | Vaginal pH | Whiff Positive? | Notes        | E2 (pg/ml) | P4 (ng/ml) |
|--------|-----------------|-------|--------------|---------------------|-------------------------------|------------|-----------------|--------------|------------|------------|
| RM1    | Placebo         | 1.1   | 7            | Y                   | coccis                        | 6.5        | Y               |              | 24         | 0.55       |
| RM1    | Placebo         | 2     | 4            | N                   | coccis                        | 7          | N               | spotting     | 63.68      | <0.050     |
| RM1    | Placebo         | 3     | 4            | N                   |                               | 7.5        | N               |              | 35         | <0.05      |
| RM1    | Placebo         | 4     | 6            | Y                   | coccis, WBCs 3+               | 7.5        | N               |              | 111.9      | 0.063      |
| RM1    | Placebo         | 5     | 8            | Y                   | coccis                        | 6.5        | N               |              | 25.11      | 4.67       |
| RM1    | Placebo         | 6     | 9            | Y                   | coccis, WBCs 2+               | 7          | N               |              | 31.48      | 3.95       |
| RM1    | Placebo         | 7     | 4            | N                   | coccis, mucus?                | 8          | N               |              | 12.88      | 1.71       |
| RM1    | Placebo         | 8     | 8            | Y                   | coccis, WBCs 3+               | 5.5        | N               |              | 14.76      | 0.661      |
| RM2    | Placebo         | 1.1   | 10           | Y                   | coccis                        | 6          | Y (SLIGHTLY)    |              | 50.91      | 9.66       |
| RM2    | Placebo         | 2     | 6            | N                   | coccis                        | 7          | N               |              | 40.94      | <0.050     |
| RM2    | Placebo         | 3     | 4            | N                   |                               | 8          | N               |              | <5         | <0.05      |
| RM2    | Placebo         | 4     | 6            | Y                   | coccis, WBCs 4+               | 7          | N               |              | 43.71      | <0.050     |
| RM2    | Placebo         | 5     | 9            | Y                   | coccis                        | 8          | N               |              | 10.15      | 3.48       |
| RM2    | Placebo         | 6     | 10           | Y                   | coccis                        | 5.5        | N               |              | 48.73      | 5.2        |
| RM2    | Placebo         | 7     | 8            | N                   | coccis, WBCs                  | 7          | N               |              | 18.63      | 1.49       |
| RM2    | Placebo         | 8     | 10           | Y                   | coccis                        | 7.5        | N               |              | 282.9      | 0.124      |
| RM3    | Placebo         | 1.1   | 6            | N                   | some diplococci               | 5.5        | N               |              | 74         | <0.05      |
| RM3    | Placebo         | 2     | 6            | Y                   |                               | 5          | N               |              | 29.43      | 0.139      |
| RM3    | Placebo         | 3     | 5            | N                   |                               | 8          | N               |              | <5         | <0.05      |
| RM3    | Placebo         | 4     | 4            | N                   | coccis, WBCs 3+               | 8          | N               |              | 46.06      | <0.050     |
| RM3    | Placebo         | 5     | 3            | N                   | WBCs 3+, diplococci           | 5          | N               |              | 56.27      | <0.050     |
| RM3    | Placebo         | 6     | 2            | N                   | coccis, diplococci, WBCs 2+   | 5          | N               |              | 753.8      | 4.94       |
| RM3    | Placebo         | 7     | 0            | N                   | coccis                        | 5          | N               |              | 12.69      | 1.26       |
| RM3    | Placebo         | 8     | 8            | Y                   | coccis, WBCs 3+               | 6.5        | Y               |              | 60.65      | <0.050     |
| RM4    | Sucrose         | 1.1   | 10           | Y                   | coccis                        | 7.5        | Y               |              | 33         | <0.05      |
| RM4    | Sucrose         | 2     | 10           | Y                   | coccis                        | 7          | N               |              | 82.03      | <0.050     |
| RM4    | Sucrose         | 3     | 10           | Y                   | coccis                        | 8.5        | N               | light        | <5         | <0.05      |
| RM4    | Sucrose         | 4     | 10           | Y                   | coccis                        | 7.5        | Y               |              | 43.8       | <0.050     |
| RM4    | Sucrose         | 5     | 9            | Y                   | ing thin curved neg rods like | 7          | N               |              | 54.62      | <0.050     |
| RM4    | Sucrose         | 6     | 9            | Y                   | coccis                        | 8          | N               |              | 91.7       | <0.050     |
| RM4    | Sucrose         | 7     | 10           | Y                   | coccis                        | 7.5        | N               | spotting     | 37.15      | 6.17       |
| RM4    | Sucrose         | 8     | 10           | Y                   | ing thin curved neg rods like | 8          | N               |              | 38.04      | 0.052      |
| RM5    | Sucrose         | 1.1   | 8            | Y                   |                               | 7          | Y               |              | 34         | <0.05      |
| RM5    | Sucrose         | 2     | 5            | N                   | coccis                        | 8          | N               |              | 73.42      | 3.91       |
| RM5    | Sucrose         | 3     | 4            | N                   | coccis, WBCs? Mucus?          | 7.5        | N               | menstruating | 68         | <0.05      |
| RM5    | Sucrose         | 4     | 4            | N                   | WBCs 4+                       | 7          | N               |              | 418.7      | 0.191      |
| RM5    | Sucrose         | 5     | 6            | Y                   | WBCs 2+, coccis               | 5.5        | N               |              | 76.12      | 10.43      |
| RM5    | Sucrose         | 6     | 8            | Y                   | coccis                        | 6          | N               |              | 77.14      | 9.58       |
| RM5    | Sucrose         | 7     | 10           | Y                   | coccis                        | 7          | N               |              | 58.78      | <0.050     |
| RM5    | Sucrose         | 8     | 9            | Y                   | coccis                        | 5          | N               |              | 79.16      | 7.42       |
| RM6    | Sucrose         | 1.1   | 10           | Y                   | coccis                        | 7          | N               |              | 144        | <0.05      |
| RM6    | Sucrose         | 2     | 5            | N                   | coccis                        | 9          | N               | spotting     | 72.5       | <0.050     |
| RM6    | Sucrose         | 3     | 3            | N                   | coccis                        | 7.5        | N               | spotting     | 8          | <0.05      |
| RM6    | Sucrose         | 4     | 4            | N                   | coccis, WBCs 3+               | 7.5        | N               |              | 84.45      | <0.050     |
| RM6    | Sucrose         | 5     | 6            | Y                   | coccis, WBCs 2+, mucus?       | 7          | N               |              | 9.89       | 2.05       |
| RM6    | Sucrose         | 6     | 9            | Y                   | coccis, WBCs 1+               | 6          | N               |              | 36.82      | 7.32       |
| RM6    | Sucrose         | 7     | 9            | Y                   | coccis                        | 6.5        | Y               |              | 72.28      | 3.95       |
| RM6    | Sucrose         | 8     | 9            | Y                   | coccis, WBCs                  | 7.5        | Y               |              | 24.92      | 7.58       |
| RM7    | Sucrose         | 1.1   | 9            | Y                   | coccis                        | 7.5        | Y               |              | 39         | 5.56       |
| RM7    | Sucrose         | 2     | 10           | Y                   |                               | 6.5        | Y               |              | 63.27      | 1.63       |
| RM7    | Sucrose         | 3     | 6            | Y                   | coccis                        | 7.5        | N               | menstruating | 35         | <0.05      |
| RM7    | Sucrose         | 4     | 9            | Y                   | ing thin curved neg rods like | 6.5        | Y               |              | 47.13      | <0.050     |
| RM7    | Sucrose         | 5     | 9            | Y                   | coccis                        | 7          | Y               |              | 32.75      | 2.51       |
| RM7    | Sucrose         | 6     | 10           | Y                   | coccis                        | 7.5        | Y               |              | 57.62      | 8.73       |
| RM7    | Sucrose         | 7     | 10           | Y                   | coccis                        | 7          | Y               |              | 29.37      | 1.12       |
| RM7    | Sucrose         | 8     | 10           | Y                   | coccis                        | 7.5        | Y               |              | 34.33      | 0.316      |
| RM8    | Placebo         | 1.1   | 8            | Y                   | WBCs, coccis                  | 6          | N               |              | 28         | 4.25       |
| RM8    | Placebo         | 2     | 9            | Y                   | coccis                        | 5.5        | Y               |              | 48.64      | 5.02       |
| RM8    | Placebo         | 3     | 10           | Y                   |                               | 7          | N               | spotting     | 6          | <0.05      |
| RM8    | Placebo         | 4     | 7            | N                   | coccis, WBCs                  | 7          | Y               | spotting     | 58.12      | <0.050     |
| RM8    | Placebo         | 5     | 8            | Y                   | WBCs 4+, coccis               | 6.5        | Y               |              | 25.12      | 0.473      |
| RM8    | Placebo         | 6     | 7            | Y                   | coccis, WBCs 3+               | 7          | Y               |              | 42.23      | 6.52       |
| RM8    | Placebo         | 7     | 9            | Y                   | coccis                        | 7          | Y               |              | 32.91      | 8.21       |
| RM8    | Placebo         | 8     | 10           | Y                   | ing thin curved neg rods like | 7          | Y               | spotting     | 178.5      | <0.050     |
| RM9    | Placebo         | 1.1   | 4            | N                   | RBCs?                         | 7          | N               | mense        | 38         | 2.11       |

|      |         |     |    |   |                                |     |          |                     |       |        |
|------|---------|-----|----|---|--------------------------------|-----|----------|---------------------|-------|--------|
| RM9  | Placebo | 2   | 7  | Y | coccis                         | 8.5 | N        |                     | 72.78 | <0.050 |
| RM9  | Placebo | 3   | 4  | N | coccis                         | 6.5 | N        |                     | 42    | <0.05  |
| RM9  | Placebo | 4   | 6  | Y | coccis, WBCs                   | 6.5 | Y        |                     | 43.53 | <0.050 |
| RM9  | Placebo | 5   | 7  | Y | coccis                         | 6.5 | Y        |                     | 530.9 | 0.635  |
| RM9  | Placebo | 6   | 8  | Y | coccis, WBCs 3+                | 8.5 | N        |                     | 47.64 | 4.02   |
| RM9  | Placebo | 7   | 4  | N | coccis                         | 7.5 | N        | frank mense         | 36.44 | 6.12   |
| RM9  | Placebo | 8   | 6  | Y | coccis                         | 5.5 | Y        |                     | 64.07 | 0.089  |
| RM10 | Sucrose | 1.1 | 10 | Y | coccis                         | 6   | Y        | mense               | 43    | 0.55   |
| RM10 | Sucrose | 2   | 8  | Y | coccis                         | 6.5 | Y        |                     | 49.83 | <0.050 |
| RM10 | Sucrose | 3   | 7  | N | coccis, WBCs                   | 7   | N        |                     | 23    | <0.05  |
| RM10 | Sucrose | 4   | 7  | Y | coccis, WBCs 3+                | 7   | Y        |                     | 78.79 | <0.050 |
| RM10 | Sucrose | 5   | 10 | Y | coccis                         | 7.5 | Y        |                     | 22.22 | 3.36   |
| RM10 | Sucrose | 6   | 10 | Y | coccis                         | 7   | Y        |                     | 27.37 | 4.64   |
| RM10 | Sucrose | 7   | 9  | Y | in curved neg rods like spag   | 6.5 | Y        |                     | 25.91 | 0.509  |
| RM10 | Sucrose | 8   | 9  | Y | thin curved neg rods like spat | 7   | Y        |                     | 12.07 | 3.54   |
| RM11 | Placebo | 1.1 | 9  | Y |                                | 6.5 | Y        |                     | 84    | <0.05  |
| RM11 | Placebo | 2   | 4  | N | coccis                         | 7   | N        | menstruating-frar   | 63.28 | 0.729  |
| RM11 | Placebo | 3   | 9  | Y | coccis                         | 8   | N        |                     | 18    | <0.05  |
| RM11 | Placebo | 4   | 6  | Y | coccis, WBCs 2+                | 7   | Y        |                     | 92.75 | <0.050 |
| RM11 | Placebo | 5   | 10 | Y | coccis                         | 7   | N        |                     | 14.71 | 1.85   |
| RM11 | Placebo | 6   | 10 | Y | coccis 4+                      | 7   | Y        |                     | 21.82 | 4.45   |
| RM11 | Placebo | 7   | 10 | Y | coccis, WBCs                   | 7.5 | Y        |                     | 41.15 | 2.55   |
| RM11 | Placebo | 8   | 9  | Y | coccis, WBCs                   | 7   | N        |                     | 133.7 | 0.086  |
| RM12 | Sucrose | 1.1 | 9  | Y | coccis                         | 7   | Y        |                     | 26    | 0.58   |
| RM12 | Sucrose | 2   | 9  | Y | coccis                         | 7   | N        |                     | 38.11 | 4.37   |
| RM12 | Sucrose | 3   | 4  | N |                                | 8.5 | N        | light               | <5    | <0.05  |
| RM12 | Sucrose | 4   | 6  | N | coccis, WBCs 3+                | 6.5 | N        |                     | 33.11 | <0.050 |
| RM12 | Sucrose | 5   | 7  | Y | s, long thin curved neg rods l | 7   | N        |                     | 336.9 | 0.315  |
| RM12 | Sucrose | 6   | 8  | Y | coccis                         | 5   | N        |                     | 24.92 | 3.32   |
| RM12 | Sucrose | 7   | 5  | N | coccis, WBCs 3+                | 7   | N        |                     | 33.28 | 4.85   |
| RM12 | Sucrose | 8   | 10 | Y | ng thin curved neg rods like   | 7.5 | N        |                     | 49.38 | 0.074  |
| RM13 | Placebo | 1.1 | 9  | Y | coccis                         | 7   | Y (VERY) | ells sour/like pict | 27    | <0.05  |
| RM13 | Placebo | 2   | 10 | Y | coccis                         | 7.5 | N        |                     | 36.1  | <0.050 |
| RM13 | Placebo | 3   | 9  | Y | coccis 4+, WBCs                | 7   | Y        | spotting            | <5    | <0.05  |
| RM13 | Placebo | 4   | 9  | Y | thin curved neg rods like spat | 6.5 | Y        |                     | 41.67 | <0.050 |
| RM13 | Placebo | 5   | 10 | Y | coccis                         | 7.5 | Y        |                     | <5    | 0.568  |
| RM13 | Placebo | 6   | 9  | Y | coccis, WBCs 2+                | 7   | Y        |                     | 37.84 | 4.13   |
| RM13 | Placebo | 7   | 9  | Y | coccis                         | 6.5 | Y        |                     | 45.02 | 5.79   |
| RM13 | Placebo | 8   | 9  | Y | ng thin curved neg rods like   | 7.5 | Y        |                     | 51.49 | <0.050 |
| RM14 | Sucrose | 1.1 | 7  | Y |                                | 6.5 | Y        | spotting            | 41    | 4.89   |
| RM14 | Sucrose | 2   | 7  | Y |                                | 7   | N        | menstruating-light  | 31.24 | 6.01   |
| RM14 | Sucrose | 3   | 4  | N |                                | 8   | N        | spotting            | 30    | <0.05  |
| RM14 | Sucrose | 4   | 4  | N | WBCs, coccis in chains         | 5.5 | N        | us with some blk    | 85.9  | 0.074  |
| RM14 | Sucrose | 5   | 4  | N | coccis                         | 4.5 | N        |                     | 55.45 | 2.86   |
| RM14 | Sucrose | 6   | 4  | N | coccis, WBCs 1+                | 4.5 | N        |                     | 18.5  | 6.64   |
| RM14 | Sucrose | 7   | 4  | N | coccis                         | 7   | N        | spotting a little   | 64.49 | 0.161  |
| RM14 | Sucrose | 8   | 9  | Y | coccis                         | 4.5 | N        |                     | 19.19 | 5.58   |
| RM15 | Sucrose | 1.1 | 4  | N | diplococci                     | 8   | N        |                     | 43    | <0.05  |
| RM15 | Sucrose | 2   | 10 | Y | coccis                         | 6.5 | Y        |                     | 26.27 | 0.629  |
| RM15 | Sucrose | 3   | 4  | N | coccis                         | 8   | N        | spotting            | 36    | <0.05  |
| RM15 | Sucrose | 4   | 4  | N | WBCs 3+                        | 6   | N        |                     | 61.04 | 0.063  |
| RM15 | Sucrose | 5   | 5  | N | coccis, WBCs                   | 5.5 | N        |                     | 27.43 | 4.31   |
| RM15 | Sucrose | 6   | 8  | Y | coccis                         | 6.5 | Y        |                     | 15.21 | 3.99   |
| RM15 | Sucrose | 7   | 5  | N | coccis                         | 6.5 | N        | spotting            | 8.54  | 0.063  |
| RM15 | Sucrose | 8   | 4  | N | coccis, WBCs 4+                | 4.5 | N        |                     | 43.58 | <0.050 |
| RM16 | Placebo | 1.1 | 10 | Y |                                | 7   | N        |                     | 63    | 0.06   |
| RM16 | Placebo | 2   | 9  | Y |                                | 6.5 | Y        |                     | 76.14 | 6.39   |
| RM16 | Placebo | 3   | 6  | N | lococci; odd slide, not a lot  | 8.5 | N        | spotting            | 66    | <0.05  |
| RM16 | Placebo | 4   | 4  | N | WBCs                           | 6.5 | N        |                     | 89.07 | <0.050 |
| RM16 | Placebo | 5   | 7  | Y | coccis, WBCs 2+                | 6.5 | N        |                     | 21.93 | 1.14   |
| RM16 | Placebo | 6   | 9  | Y | coccis, WBCs 2+                | 6.5 | N        |                     | 30.37 | 7.03   |
| RM16 | Placebo | 7   | 5  | N | coccis                         | 7   | N        | spotting            | 59.22 | 11.98  |
| RM16 | Placebo | 8   | 9  | Y | coccis, WBCs                   | 6   | N        |                     | 332.3 | 0.075  |
