# Supplementary material for: Longitudinal Profiling of the Macaque Vaginal Microbiome Reveals Similarities to Diverse Human Vaginal Communities
Source: PubMed Central journal article supplement (PMC8092128; doi:10.1128/msystems.01322-20), 2021-04-27
Supplement: mSystems.01322-20-st002.pdf [file mSystems.01322-20-st002.pdf]

| Bin Id      | Marker lineage                    | Completeness | Contamination | Most similar genome                                     | Distance  | Common Kmer | Host                       | Source                         |
|-------------|-----------------------------------|--------------|---------------|---------------------------------------------------------|-----------|-------------|----------------------------|--------------------------------|
| RM4_T6_B4   | o_Clostridiales (UID1120)         | 87.35        | 1.6           | Anaerococcus vaginalis strain MGYG-HGUT-02315           | 0.186761  | 10          | Human                      | Gut                            |
| RM13_T6_B6  | o_Lactobacillales (UID355)        | 96.45        | 1.64          | Atopobacter sp. AH10                                    | 0.02      | 501         | Macaca fascicularis        | vaginal environment of primate |
| RM3_T6_B5   | o_Lactobacillales (UID355)        | 96.82        | 1.64          | Atopobacter sp. AH10                                    | 0.0204789 | 482         | Macaca fascicularis        | vaginal environment of primate |
| RM1_T6_B10  | p_Actinobacteria (UID2112)        | 100          | 0             | Atopobium deltae strain DNF00019                        | 0.11      | 47          | Human                      | vagina                         |
| RM12_T6_B7  | p_Actinobacteria (UID2112)        | 96.77        | 0             | Atopobium minutum strain DSM 20586                      | 0.24      | 3           | No listed                  | No listed                      |
| RM3_T6_B4   | f_Porphyrionadaceae (UID2622)     | 95.77        | 0.31          | Bacteroidales bacterium KA00251                         | 0.186761  | 10          | Human                      | No listed                      |
| RM10_T6_B4  | o_Clostridiales (UID1120)         | 96.74        | 0.7           | Bacteroides] coagulans strain DSM 20705                 | 0.16      | 16          | No listed                  | No listed                      |
| RM1_T6_B19  | k_Bacteria (UID2372)              | 93.49        | 0             | Bacteroidetes bacterium strain B12_G6                   | 0.263022  | 2           | deep-sea hydrothermal vent | sediments from dive            |
| RM4_T4_B10  | f_Porphyrionadaceae (UID2622)     | 94.58        | 0             | Barnesiella sp. An55 strain An55                        | 0.23011   | 4           | Chicken, Gallus gallus     | caecum                         |
| RM10_T6_B6  | c_Epsilonproteobacteria (UID3065) | 98.28        | 0.74          | Campylobacter sputorum biovar sputorum strain NCTC12475 | 0.15      | 22          | No listed                  | No listed                      |
| RM14_T6_B2  | c_Epsilonproteobacteria (UID3065) | 98.77        | 0.74          | Campylobacter sputorum subsp. bubulus strain NCTC12474  | 0.16      | 19          | No listed                  | No listed                      |
| RM1_T6_B11  | o_Clostridiales (UID1212)         | 83.5         | 0             | Clostridiales bacterium KA00134                         | 0.26      | 2           | Human                      | vagina                         |
| RM10_T6_B7  | o_Clostridiales (UID1120)         | 88.77        | 0             | Clostridiales bacterium KA00274                         | 0.22      | 5           | Human                      | Vagina                         |
| RM13_T6_B10 | o_Clostridiales (UID1120)         | 88.06        | 0             | Clostridiales bacterium KA00274                         | 0.22      | 5           | Human                      | Vagina                         |
| RM13_T6_B12 | o_Clostridiales (UID1120)         | 84.74        | 0             | Clostridiales bacterium KA00274                         | 0.24      | 3           | Human                      | Vagina                         |
| RM14_T6_B4  | o_Clostridiales (UID1120)         | 81.21        | 0.71          | Clostridiales bacterium KA00274                         | 0.21      | 6           | Human                      | Vagina                         |
| RM15_T6_B3  | o_Clostridiales (UID1120)         | 88.77        | 0             | Clostridiales bacterium KA00274                         | 0.22      | 5           | Human                      | Vagina                         |
| RM3_T6_B7   | o_Clostridiales (UID1120)         | 88.59        | 0.71          | Clostridiales bacterium KA00274                         | 0.210897  | 6           | Human                      | Vagina                         |
| RM10_T6_B9  | k_Bacteria (UID2329)              | 100          | 0             | Enterococcus faecium strain VRECG18                     | 0.19      | 9           | Human                      | Stool                          |
| RM7_T4_B9   | o_Clostridiales (UID1212)         | 83.45        | 0             | Eubacteriaceae bacterium CM5                            | 0.23011   | 4           | No listed                  | No listed                      |
| RM12_T6_B3  | o_Clostridiales (UID1212)         | 87.47        | 0.67          | Finexgoldia magna strain 121273                         | 0.145     | 24          | Human                      | Othopedic joint                |
| RM11_T6_B3  | f_Bifidobacteriaceae (UID1458)    | 96.61        | 0             | Gardnerella sp. KA00735                                 | 0.2       | 7           | Human                      | Vagina                         |
| RM12_T6_B6  | f_Bifidobacteriaceae (UID1458)    | 96.61        | 0             | Gardnerella sp. KA00735                                 | 0.2       | 7           | Human                      | Vagina                         |
| RM4_T6_B6   | f_Bifidobacteriaceae (UID1458)    | 96.84        | 0             | Gardnerella sp. KA00735                                 | 0.191731  | 9           | Human                      | Vagina                         |
| RM3_T6_B9   | f_Bifidobacteriaceae (UID1458)    | 89.57        | 0.23          | Gardnerella sp. KA00735                                 | 0.192292  | 8           | Human                      | Vagina                         |
| RM5_T6_B1   | f_Bifidobacteriaceae (UID1458)    | 96.61        | 0             | Gardnerella sp. KA00735                                 | 0.203604  | 7           | Human                      | Vagina                         |
| RM13_T4_B8  | f_Bifidobacteriaceae (UID1458)    | 94.55        | 0             | Gardnerella vaginalis 5-1                               | 0.2       | 7           | Human                      | Vagina                         |
| RM16_T6_B1  | f_Bifidobacteriaceae (UID1458)    | 99.76        | 0.45          | Gardnerella vaginalis 5-1                               | 0.2       | 8           | Human                      | Vagina                         |
| RM6_T6_B1   | f_Bifidobacteriaceae (UID1458)    | 87.31        | 0.72          | Gardnerella vaginalis strain PSS_7772B                  | 0.210897  | 6           | Human                      | Urine                          |
| RM4_T4_B9   | f_Spirochaetaceae (UID2535)       | 97.12        | 1.05          | Gardnerella vaginalis strain UGent 06.41                | 0.263022  |             | Human                      | Vagina                         |
| RM1_T6_B8   | f_Spirochaetaceae (UID2535)       | 97.12        | 1.05          | Gardnerella vaginalis strain UGent 06.41                | 0.263022  | 2           | Human                      | vagina                         |
| RM13_T6_B9  | p_Firmicutes (UID1022)            | 95.95        | 0             | Lactobacillus helveticus strain 459_LHEL                | 0.26      | 2           | Human                      | No listed                      |
| RM2_T6_B2   | f_Actinomycetaceae (UID1531)      | 80.2         | 1.42          | Mobiluncus mulieris ATCC 35243                          | 0.170926  | 14          | Human                      | Urogenital tract, vagina       |
| RM7_T4_B5   | f_Actinomycetaceae (UID1531)      | 83.29        | 1.58          | Mobiluncus mulieris FB024-16                            | 0.108487  | 54          | Human                      | Urogenital tract, Vaginal      |
| RM4_T6_B2   | f_Actinomycetaceae (UID1531)      | 99.05        | 1.54          | Mobiluncus mulieris FB024-16                            | 0.154223  | 20          | Human                      | Urogenital tract, Vaginal      |
| RM14_T6_B1  | f_Actinomycetaceae (UID1531)      | 88.63        | 1.11          | Mobiluncus mulieris strain NCTC11497                    | 0.196     | 18          | Human                      | Vagina                         |
| RM3_T6_B2   | f_Actinomycetaceae (UID1531)      | 98.1         | 1.49          | Mobiluncus mulieris strain NCTC11819                    | 0.151946  | 21          | No listed                  | No listed                      |
| RM8_T4_B1   | f_Actinomycetaceae (UID1531)      | 80.58        | 1.26          | Mobiluncus mulieris strain NCTC11819                    | 0.0852783 | 91          | Human                      | No listed                      |
| RM16_T6_B2  | p_Actinobacteria (UID2112)        | 95.16        | 0             | Paenibacillus stellifer DSM 14472                       | 0.26      | 2           | No listed                  | No listed                      |
| RM10_T6_B5  | f_Porphyrionadaceae (UID2622)     | 94.89        | 0             | Parabacteroides distans                                 | 0.24      | 3           | No listed                  | No listed                      |
| RM13_T4_B4  | f_Porphyrionadaceae (UID2622)     | 94.89        | 0             | Parabacteroides distans                                 | 0.24      | 3           | Human                      | Feces                          |
| RM13_T6_B8  | f_Porphyrionadaceae (UID2622)     | 94.89        | 0             | Parabacteroides distans                                 | 0.24      | 3           | Human                      | Feces                          |
| RM1_T6_B9   | f_Porphyrionadaceae (UID2622)     | 94.89        | 0             | Parabacteroides distans                                 | 0.243761  | 3           | Human                      | faeces                         |
| RM7_T4_B8   | f_Porphyrionadaceae (UID2622)     | 94.89        | 0             | Parabacteroides distans                                 | 0.243761  | 3           | No listed                  | Faeces                         |
| RM1_T6_B13  | o_Clostridiales (UID1120)         | 95.1         | 0             | Peptoniphilus sp. KHD4                                  | 0.044     | 244         | Human                      | vagina                         |
| RM13_T6_B6  | o_Clostridiales (UID1212)         | 91.5         | 0             | Peptoniphilus sp. oral taxon 836 str. F0141             | 0.2       | 7           | Human                      | Oral                           |
| RM4_T4_B8   | o_Clostridiales (UID1212)         | 91.5         | 0             | Peptoniphilus sp. oral taxon 836 str. F0141             | 0.186761  | 10          | Human                      | Oral                           |
| RM4_T6_B3   | f_Porphyrionadaceae (UID2622)     | 99.61        | 0.16          | Porphyromonas asaccharolytica PR426713P-I               | 0.154223  | 20          | Human                      | Urogenital tract, Vaginal      |
| RM10_T6_B3  | f_Porphyrionadaceae (UID2622)     | 93.95        | 0.42          | Porphyromonas bennonis DSM 23058                        | 0.16      | 17          | Human                      | Skin abcess                    |
| RM15_T6_B1  | f_Porphyrionadaceae (UID2622)     | 95.05        | 0.31          | Porphyromonas bennonis DSM 23058                        | 0.16      | 17          | Human                      | Skin abcess                    |
| RM13_T4_B1  | p_Bacteroidetes (UID2605)         | 87.94        | 0.16          | Porphyromonas somerae strain KA00683                    | 0.26      | 2           | Human                      | Vagina                         |
| RM13_T6_B3  | p_Bacteroidetes (UID2605)         | 95.71        | 0             | Porphyromonas somerae strain KA00683                    | 0.26      | 2           | Human                      | Vagina                         |
| RM7_T4_B3   | g_Prevotella (UID2721)            | 96.57        | 0.12          | Prevotella bivia DNF00188                               | 0.23011   | 4           | Human                      | Vagina                         |
| RM12_T6_B2  | g_Prevotella (UID2721)            | 96.61        | 0.12          | Prevotella buccalis strain UMB0536                      | 0.23      | 4           | Human                      | catheter                       |
| RM4_T6_B1   | g_Prevotella (UID2721)            | 96.41        | 0.33          | Prevotella buccalis strain UMB0536                      | 0.0543589 | 190         | Human                      | Catheter                       |
| RM10_T6_B1  | g_Prevotella (UID2721)            | 93.1         | 0.12          | Prevotella buccalis strain UMB0536                      | 0.068     | 134         | Human                      | Catheter                       |
| RM4_T4_B7   | g_Prevotella (UID2721)            | 97.14        | 0             | Prevotella pleuritidis F0068                            | 0.219531  | 5           | No listed                  | No listed                      |
| RM11_T6_B2  | g_Prevotella (UID2721)            | 88.41        | 0             | Prevotella timonensis strain DNF00076                   | 0.26      | 2           | Human                      | Vagina                         |
| RM1_T6_B6   | g_Prevotella (UID2721)            | 96.61        | 0             | Prevotella timonensis strain DNF00076                   | 0.243761  | 3           | Human                      | vagina                         |
| RM2_T6_B1   | g_Prevotella (UID2721)            | 92.38        | 0.4           | Prevotella timonensis strain DNF00076                   | 0.263022  | 2           | Human                      | faeces                         |
| RM15_T6_B4  | k_Bacteria (UID2329)              | 100          | 0             | Sneathia sp. Sn35                                       | 0.21      | 6           | Human                      | Amniotic fluid                 |
| RM10_T4_B1  | k_Bacteria (UID2329)              | 93.26        | 0             | Sneathia sp. Sn35                                       | 0.197292  | 8           | Human                      | Amniotic fluid                 |
| RM13_T4_B6  | o_Clostridiales (UID1212)         | 82.33        | 0             | Streptococcus sp. HMSC061D01                            | 0.21      | 6           | Human                      | throat                         |
| RM1_T6_B14  | o_Clostridiales (UID1125)         | 84.6         | 0.61          | Tissierella bacterium KA00581                           | 0.18      | 11          | Human                      | vagina                         |
| RM13_T6_B11 | o_Clostridiales (UID1125)         | 97.41        | 0.61          | Tissierella bacterium KA00581                           | 0.15      | 20          | Human                      | Vagina                         |
| RM4_T6_B8   | o_Clostridiales (UID1125)         | 98.02        | 0.61          | Tissierella bacterium KA00581                           | 0.164662  | 16          | Human                      | Vagina                         |
| RM13_T4_B3  | f_Spirochaetaceae (UID2535)       | 97.12        | 1.05          | Treponema sp. strain W1P33.006                          | 0.29      | 1           | Pig                        | Feces                          |
| RM13_T4_B2  | f_Spirochaetaceae (UID2512)       | 96.24        | 0.85          | Treponema vincentii ATCC 35580                          | 0.21      | 6           | Human                      | Oral                           |

|            |                                 |       |      |                                             |           |     |           |                       |
|------------|---------------------------------|-------|------|---------------------------------------------|-----------|-----|-----------|-----------------------|
| RM4_T4_B5  | f__Spirochaetaceae (UID2512)    | 98.66 | 1.21 | Treponema vincentii ATCC 35580              | 0.23011   | 4   | Human     | the human oral cavity |
| RM7_T4_B4  | f__Spirochaetaceae (UID2512)    | 98.66 | 1.21 | Treponema vincentii ATCC 35580              | 0.23011   | 4   | Human     | Oral cavity           |
| RM3_T6_B8  | o__Clostridiales (UID1120)      | 84.49 | 0    | uncultured Clostridium sp. strain UMGS1923  | 0.263022  | 2   | Human     | Gut                   |
| RM13_T6_B4 | f__Porphyromonadaceae (UID2622) | 97.01 | 0.47 | uncultured Porphyromonas sp. strain UMGS547 | 0.17      | 15  | Human     | gut                   |
| RM4_T4_B6  | f__Porphyromonadaceae (UID2622) | 96.23 | 0.63 | uncultured Porphyromonas sp. strain UMGS547 | 0.161822  | 17  | Human     | Gut                   |
| RM3_T6_B3  | g__Prevotella (UID2721)         | 98.81 | 0    | uncultured Prevotella sp. strain UMGS950    | 0.0690061 | 133 | No listed | No listed             |
| RM4_T6_B9  | k__Bacteria (UID2329)           | 94.38 | 0.37 | uncultured Sneathia sp. strain UMGS437      | 0.164662  | 16  | Human     | Vagina                |
| RM12_T6_B5 | p__Firmicutes (UID1022)         | 96.84 | 0    | Veillonellaceae bacterium DNF00626          | 0.22      | 5   | Human     | Vagina                |
| RM4_T4_B11 | p__Firmicutes (UID1022)         | 94.26 | 0.57 | Veillonellaceae bacterium DNF00626          | 0.219531  | 5   | Human     | vagina                |
| RM4_T6_B5  | p__Firmicutes (UID1022)         | 94.15 | 0.95 | Veillonellaceae bacterium DNF00626          | 0.210897  | 6   | Human     | Vagina                |
